# Supplementary material for: Restrictions on Hospital Referrals from Long-Term Care Homes in Madrid and COVID-19 Mortality from March to June 2020: A Systematic Review of Studies Conducted in Spain
Source: MDPI journal article supplement (doi:10.3390/epidemiologia4020019), 2023-06-06
Supplement: s1 [file s1]

Supplementary material

Table S1. PRISMA 2020 checklist

| Section and topic             | Item # | Location where item is reported                                                 |
|-------------------------------|--------|---------------------------------------------------------------------------------|
| <b>Title</b>                  |        |                                                                                 |
| Title                         | 1      | Lines 2 and 3                                                                   |
| <b>Abstract</b>               |        |                                                                                 |
| Abstract                      | 2      | See Table S2                                                                    |
| <b>Introduction</b>           |        |                                                                                 |
| Rationale                     | 3      | Lines 26-56 and 80-85                                                           |
| Objective                     | 4      | Lines 87-95                                                                     |
| <b>Methods</b>                |        |                                                                                 |
| Eligibility criteria          | 5      | Lines 97-102. We applied inclusion criteria. No exclusion criteria was applied. |
| Information sources           | 6      | 99-102. Figure 1.                                                               |
| Search strategy               | 7      | Lines 103-105 and 112-113. Figure 1.                                            |
| Selection process             | 8      | Lines 106-108 and 113-114. Figure 1.                                            |
| Data collection process       | 9      | Lines 106-110, 115-117                                                          |
| Data items                    | 10a    | Line 123                                                                        |
|                               | 10b    | Lines 124-125                                                                   |
| Study risk of bias assessment | 11     | Lines 129-131                                                                   |
| Effect measures               | 12     | Line 126-128                                                                    |
| Synthesis methods             | 13a    | Table 2. Line 145                                                               |
|                               | 13b    | Lines 110-111                                                                   |
|                               | 13c    | Line 121                                                                        |
|                               | 13d    | Lines 126-128. Table 3.                                                         |
|                               | 13e    | Lines 149-162                                                                   |
|                               | 13f    | No sensitivity analyses was conducted                                           |
| Reporting bias assessment     | 14     | Lines 112-113                                                                   |
| Certainty assessment          | 15     | Line 126                                                                        |
| <b>Results</b>                |        |                                                                                 |
| Study selection               | 16a    | Table 2. Line 145                                                               |
|                               | 16b    | All identified studies fulfill selection criteria based on inclusion criteria   |
| Study characteristics         | 17     | Table 1                                                                         |

|                                               |     |                                                   |
|-----------------------------------------------|-----|---------------------------------------------------|
| Risk of bias in studies                       | 18  | Lines 142-143                                     |
| Results of individual studies                 | 19  | Table 3. Line 196<br>Figures 2 and 3              |
| Results of synthesis                          | 20a | One outcome in Column 8 <sup>th</sup> of Table 3. |
|                                               | 20b | Table 3.                                          |
|                                               | 20c | No heterogeneity analyses were conducted          |
|                                               | 20d | No sensitivity analyses.                          |
| Reporting biases                              | 21  | Potential bias discussion in lines 321-328        |
| Certainty of evidence                         | 22  | Table 3, Column 8th                               |
| Discussion                                    |     |                                                   |
| Discussion                                    | 23a | Lines 257-289                                     |
|                                               | 23b | Lines 321-369                                     |
|                                               | 23c | Line 326-328 and 366-367                          |
|                                               | 23d | Lines 369-377                                     |
| Other information                             | 24a | The review was not registered                     |
|                                               | 24b | The review protocol was not published             |
|                                               | 24c | Not apply                                         |
| Support                                       | 25  | No financial support was available                |
| Competing interest                            | 26  | None                                              |
| Availability of data code and other materials | 27  | All data is publicly available.                   |

Table S2. PRISMA 2020 for abstract checklist. Word limit in epidemiology: 150 words

| Section and topic       | Item # | Checklist item                                           |
|-------------------------|--------|----------------------------------------------------------|
| <b>Title</b>            | 1      | x                                                        |
| <b>Background</b>       |        |                                                          |
| Objectives              | 2      | x                                                        |
| <b>Methods</b>          |        |                                                          |
| Eligibility criteria    | 3      | x                                                        |
| Information sources     | 4      | x                                                        |
| Risk of bias            | 5      | Not covered in abstract. The abstract word number is 150 |
| Synthesis of results    | 6      | x                                                        |
| <b>Results</b>          |        |                                                          |
| Included Studies        | 7      | x                                                        |
| Synthesis of results    | 8      | x                                                        |
| <b>Discussion</b>       |        |                                                          |
| Limitations of evidence | 9      | X                                                        |
| Interpretation          | 10     | X                                                        |
| <b>Other</b>            |        |                                                          |
| Funding                 | 11     | At the end of the main paper                             |
| Registration            | 12     | Not applied                                              |
